# Supplementary material for: Nitric oxide-release study of a bio-inspired copper(i)-nitrito complex under chemical and biological conditions
Source: Royal Society of Chemistry journal article supplement (doi:10.1039/c8dt02281j), 2018-01-01
Supplement: c8dt02281j1.pdf [file c8dt02281j1.pdf]

Electronic Supplementary Information for

**Nitric Oxide Release study of a Bio-inspired Copper(I)-Nitrito  
Complex on Chemical and Biological Conditions**

Wan-Jung Chuang<sup>a</sup>, Manmath Narwane<sup>a</sup>, Hsing-Yin Chen<sup>a</sup>, Chai-Lin Kao<sup>a,b</sup>, Bin  
Huang<sup>c</sup>, Kuang-Mei Hsu<sup>d</sup>, Yun-Ming Wang<sup>\*,c,d</sup>, Sodio C. N. Hsu<sup>\*,a,b</sup>

<sup>a</sup>*Department of Medicinal and Applied Chemistry, Kaohsiung Medical University,  
Kaohsiung 807, Taiwan*

<sup>b</sup>*Department of Medical Research, Kaohsiung Medical University Hospital,  
Kaohsiung 807, Taiwan*

<sup>c</sup>*Department of Biomedical Science and Environmental Biology, Kaohsiung Medical  
University, Kaohsiung 807, Taiwan*

<sup>d</sup>*Department of Biological Science and Technology, Institute of Molecular Medicine  
and Bioengineering, National Chiao Tung University, Hsinchu 300, Taiwan*

## Contents

|                                                                                                                                                                                                                                                                                                                                                                 |    |
|-----------------------------------------------------------------------------------------------------------------------------------------------------------------------------------------------------------------------------------------------------------------------------------------------------------------------------------------------------------------|----|
| <b>Fig. S1</b> Absorption spectra of complex <b>2(a)</b> , <b>3(b)</b> and <b>4(c)</b> in CH <sub>2</sub> Cl <sub>2</sub> at room temperature.....                                                                                                                                                                                                              | 4  |
| <b>Fig. S2</b> FT-IR spectra of 2-(diphenylphosphino) aniline and complex <b>2</b> , <b>3</b> and <b>4</b> . (KBr pellet). .....                                                                                                                                                                                                                                | 5  |
| <b>Fig. S3</b> FT-IR spectra for the <sup>14</sup> NO <sub>2</sub> and <sup>15</sup> NO <sub>2</sub> isotopomers of complex <b>4</b> (KBr pellet) .....                                                                                                                                                                                                         | 6  |
| <b>Fig. S4</b> ORTEP representation of complexes <b>2(a)</b> and <b>3(b)</b> (50% ellipsoids, hydrogen atoms not shown for clarity).....                                                                                                                                                                                                                        | 7  |
| <b>Fig. S5</b> NO generation experiments for <b>4</b> . NO concentration performed by calibrating curve response with known concentrations of NO mixed with N <sub>2</sub> (10 ppm, 20 ppm, 30 ppm and 40 ppm of NO in N <sub>2</sub> ); molar quantities were calculated using the ideal gas equation. ....                                                    | 8  |
| <b>Fig.S6</b> Time dependent detailed study of UV-spectrum observed in complex <b>4</b> after protonation with excess of TFA at 273 K. ....                                                                                                                                                                                                                     | 8  |
| <b>Fig. S7.</b> Eyring plot for the reactions of <b>1</b> and TFA.....                                                                                                                                                                                                                                                                                          | 9  |
| <b>Fig. S8</b> Eyring plot for the reactions of <b>4</b> and TFA.....                                                                                                                                                                                                                                                                                           | 9  |
| <b>Fig. S9</b> (a) Absorption spectral change of complex <b>3</b> for the titration of TFA (0~3 eq. TFA) in CH <sub>2</sub> Cl <sub>2</sub> at room temperature, Each spectrum was obtained after equilibration for 10 min. (b) Absorbance change at 300 nm over TFA concentration .....                                                                        | 10 |
| <b>Fig. S10</b> FT-IR spectra of complex <b>3</b> before and after protonation .....                                                                                                                                                                                                                                                                            | 11 |
| <b>Fig.S11</b> NMR titration spectra of complex <b>3</b> for the titration of TFA (0~2 eq. TFA) in CH <sub>2</sub> Cl <sub>2</sub> at room temperature, each spectra was obtained after equilibration for 10 min. ....                                                                                                                                          | 11 |
| <b>Fig. S12</b> (a) Absorption spectral change of complex <b>4</b> for the titration of TFA (0~3 eq. TFA) in CH <sub>2</sub> Cl <sub>2</sub> at room temperature, Each spectrum was obtained after equilibration for 10 min. (b) Absorbance change at 300 nm over TFA concentration. ....                                                                       | 12 |
| <b>Fig. S13</b> EPR spectra of complex <b>4</b> for the titration of TFA (0~1 eq. TFA) in CH <sub>2</sub> Cl <sub>2</sub> at room temperature, each spectra was obtained after equilibration for 10 mins. ....                                                                                                                                                  | 13 |
| <b>Fig. S14</b> Fluorescence emission spectra of FA-OMe (1 μM) upon reaction with various amounts of DETA NONOate in 100 mM PBS buffer with 0.54% DMSO of pH 8.5 at 25.0 ± 0.1 °C( λ <sub>ex</sub> 460 nm, λ <sub>em</sub> 515 nm). Inset shows an enhancement in fluorescence intensity presents a linear correlation with concentration of DETA NONOate. .... | 14 |

**Fig. S15** Normalized fluorescence response of the FA-OMe (1  $\mu$ M) with DETA NONOate, **1**, and **4** (5  $\mu$ M) in different pH values (100 mM PBS buffer with 0.54% DMSO) and  $25.0 \pm 0.1$  °C. Tabulated values indicates the NO release response shown by DETA NONOate compared with the complex **4** and complex **1** .....15

**Tab. S1** First order rate constants for the reaction of **1** and **4** with excess TFA in  $\text{CH}_2\text{Cl}_2$  at 273 K. ....15

**Tab. S2** Selected Bond Lengths ( $\text{\AA}$ ) and Angles ( $^\circ$ ) for **2**, **3**, and **4**. ....16

(a)

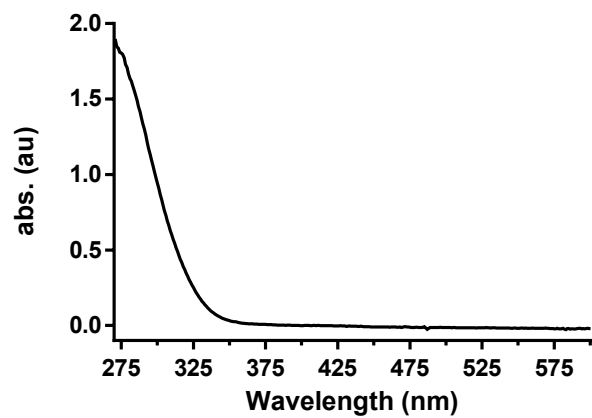

(b)

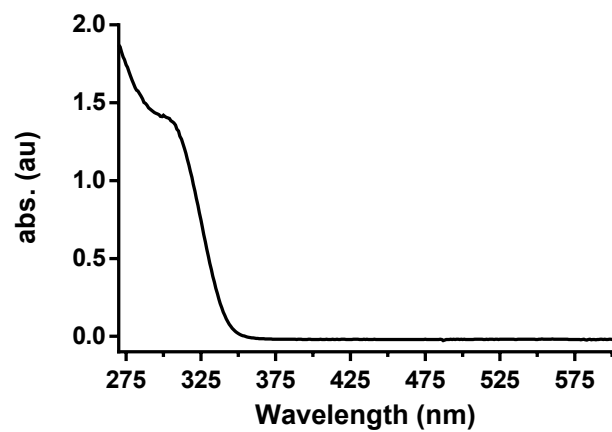

(c)

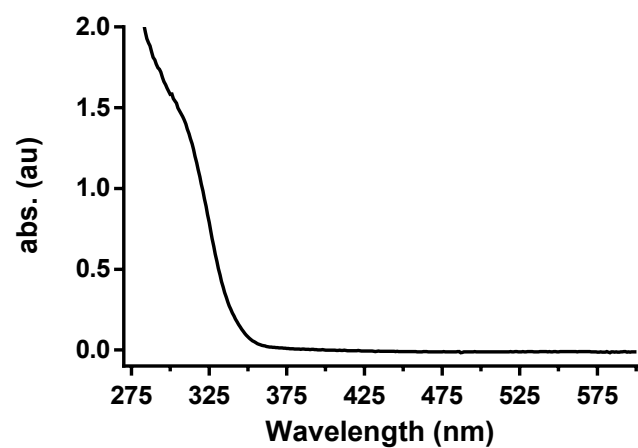

**Fig. S1** Absorption spectra of complex **2(a)**, **3(b)** and **4(c)** in  $\text{CH}_2\text{Cl}_2$  at room temperature.

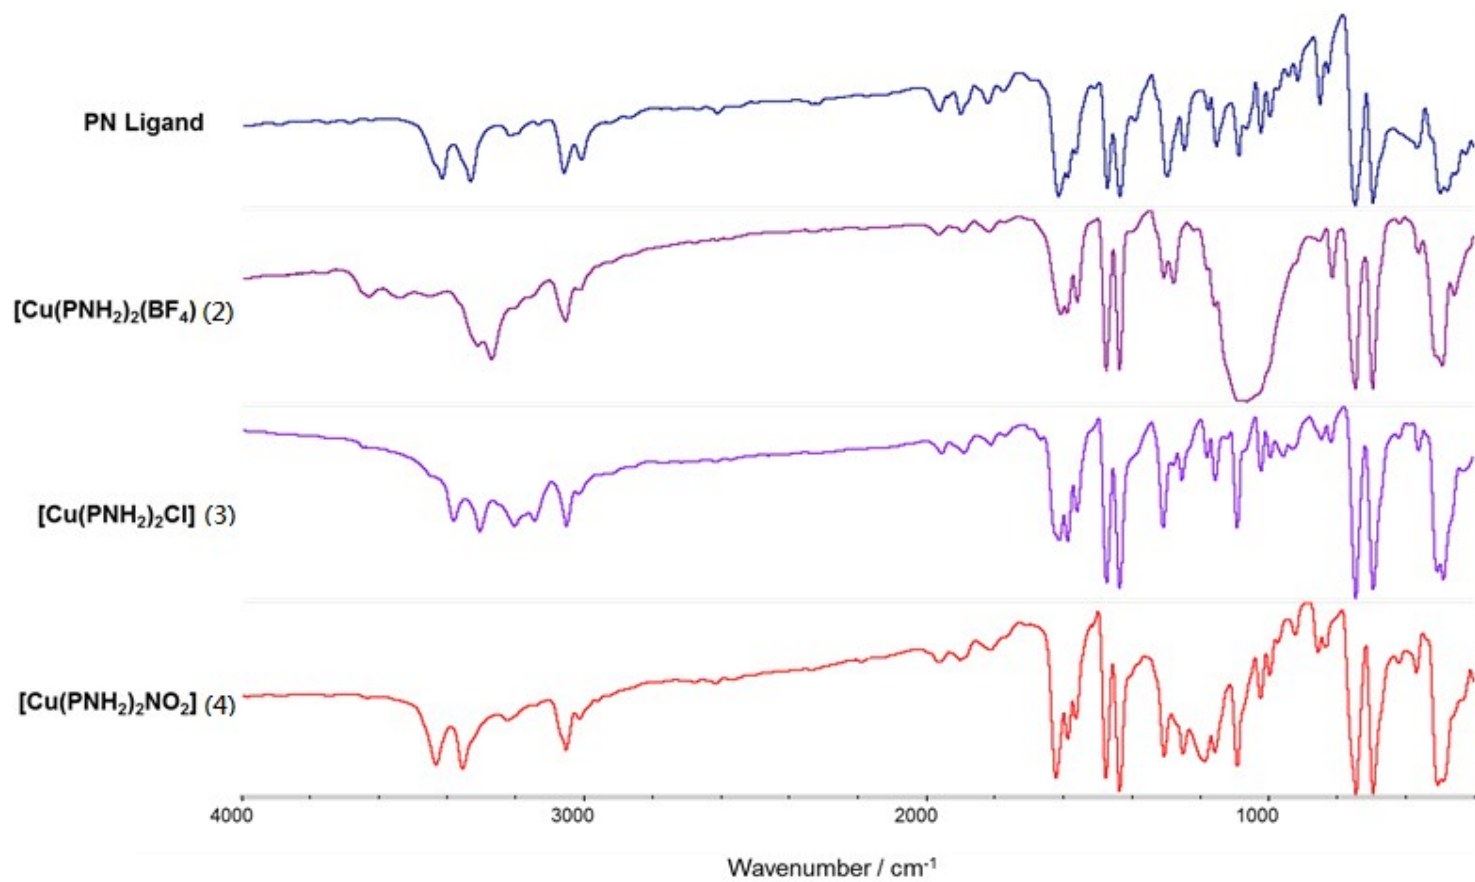

Fig. S2 FT-IR spectra of 2-(diphenylphosphino) aniline and complex **2**, **3** and **4**. (KBr pellet).

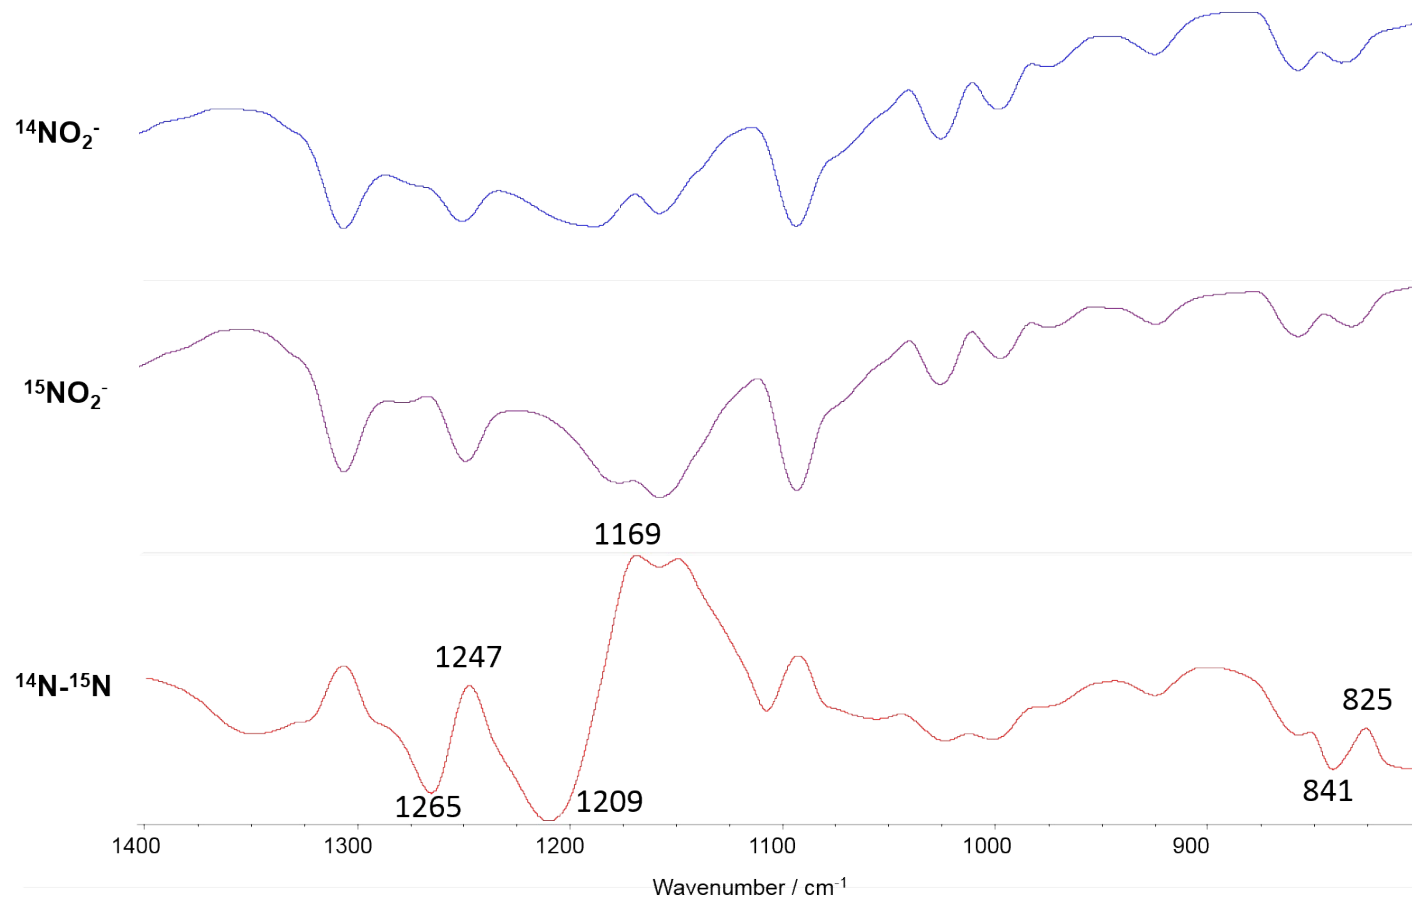

**Fig. S3** FT-IR spectra for the <sup>14</sup>NO<sub>2</sub> and <sup>15</sup>NO<sub>2</sub> isotopomers of complex 4 (KBr pellet)

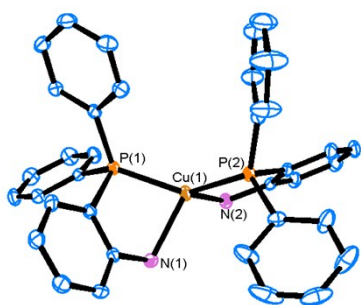

(a)

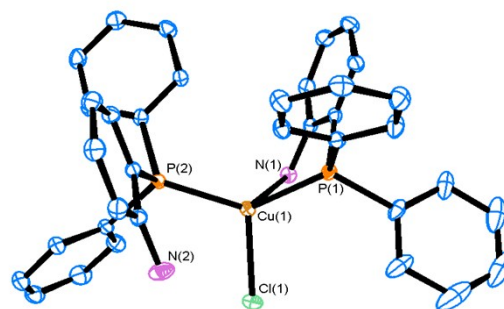

(b)

**Fig. S4** ORTEP representation of complexes **2(a)** and **3(b)** (50% ellipsoids, hydrogen atoms not shown for clarity).

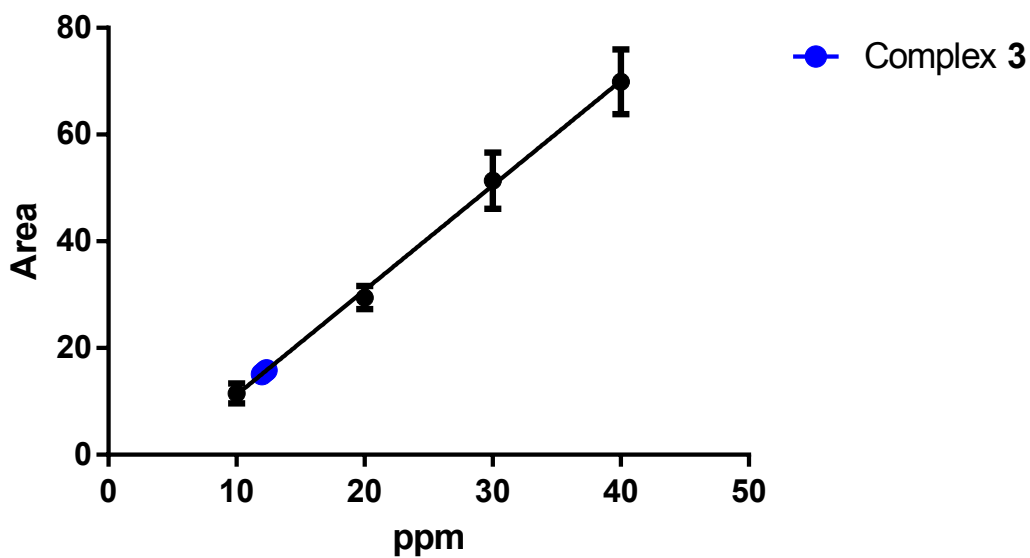

**Fig. S5** NO generation experiments for **4**. NO concentration performed by calibrating curve response with known concentrations of NO mixed with N<sub>2</sub> (10 ppm, 20 ppm, 30 ppm and 40 ppm of NO in N<sub>2</sub>); molar quantities were calculated using the ideal gas equation.

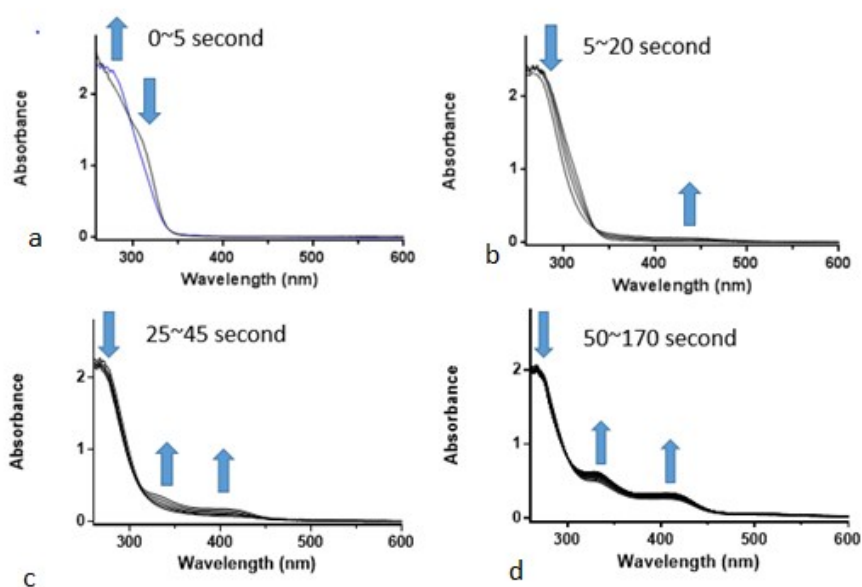

**Fig.S6** Time dependent detailed study of UV-spectrum observed in complex **4** after protonation with excess of TFA at 273 K.



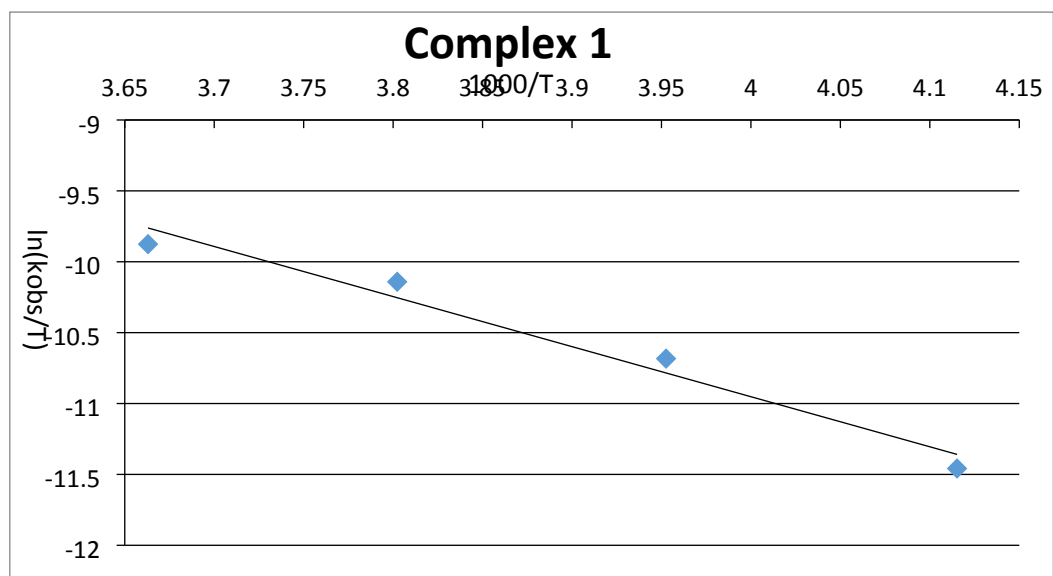

**Fig. S7.** Eyring plot for the reactions of **1** and TFA.

The  $\Delta H^\ddagger$  and  $\Delta S^\ddagger$  values are determined from the Eyring equation,  $k' = (kT/h)\exp(\Delta S^\ddagger/R) \exp(-\Delta H^\ddagger/RT)$ .

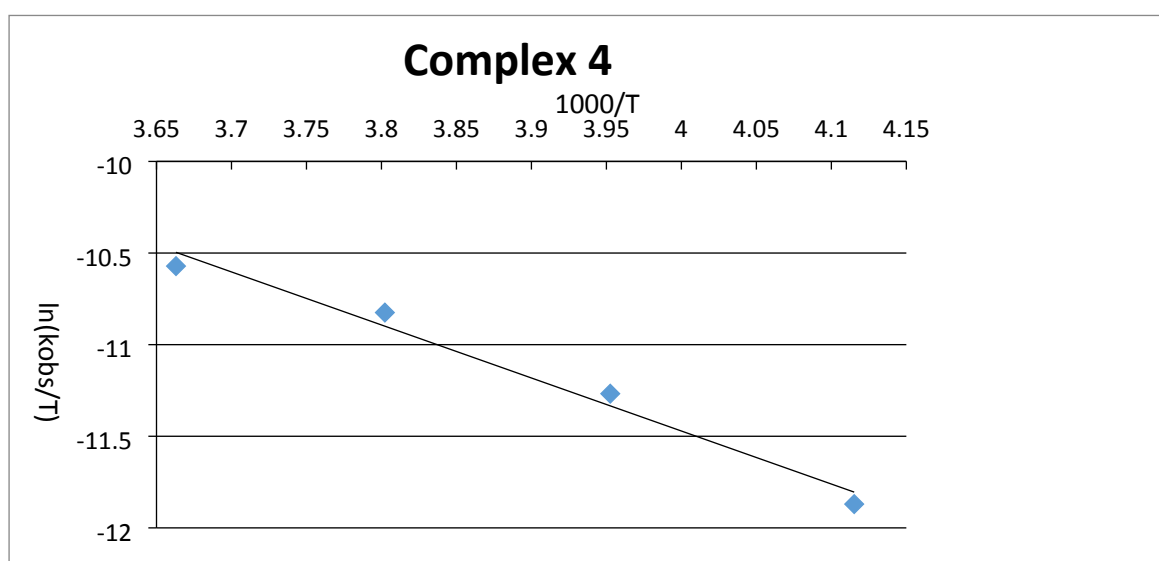

**Fig. S8** Eyring plot for the reactions of **4** and TFA.

The  $\Delta H^\ddagger$  and  $\Delta S^\ddagger$  values are determined from the Eyring equation,  $k' = (kT/h)\exp(\Delta S^\ddagger/R) \exp(-\Delta H^\ddagger/RT)$ .

(a)

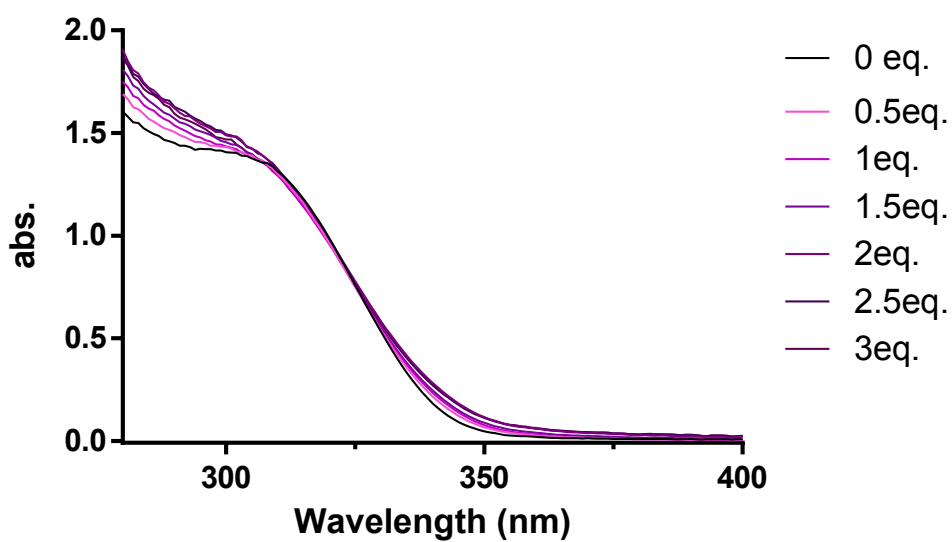

(b)

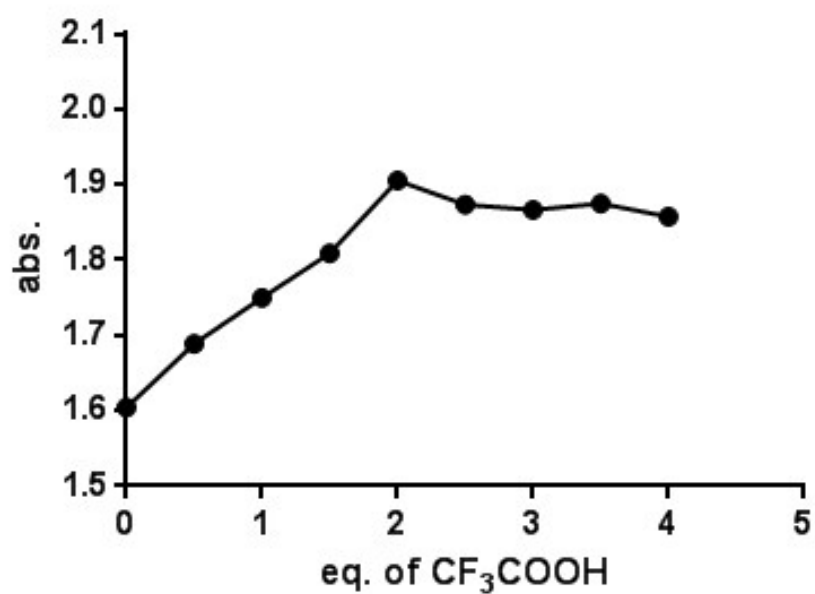

**Fig. S9** (a) Absorption spectral change of complex **3** for the titration of TFA (0~3 eq. TFA) in CH<sub>2</sub>Cl<sub>2</sub> at room temperature, Each spectrum was obtained after equilibration for 10 min. (b) Absorbance change at 300 nm over TFA concentration

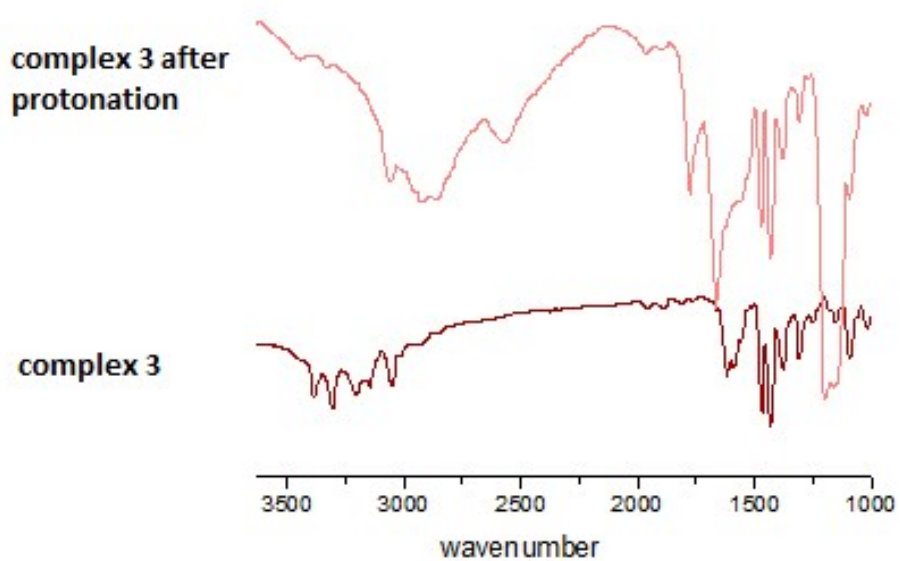

**Fig. S10** FT-IR spectra of complex **3** before and after protonation

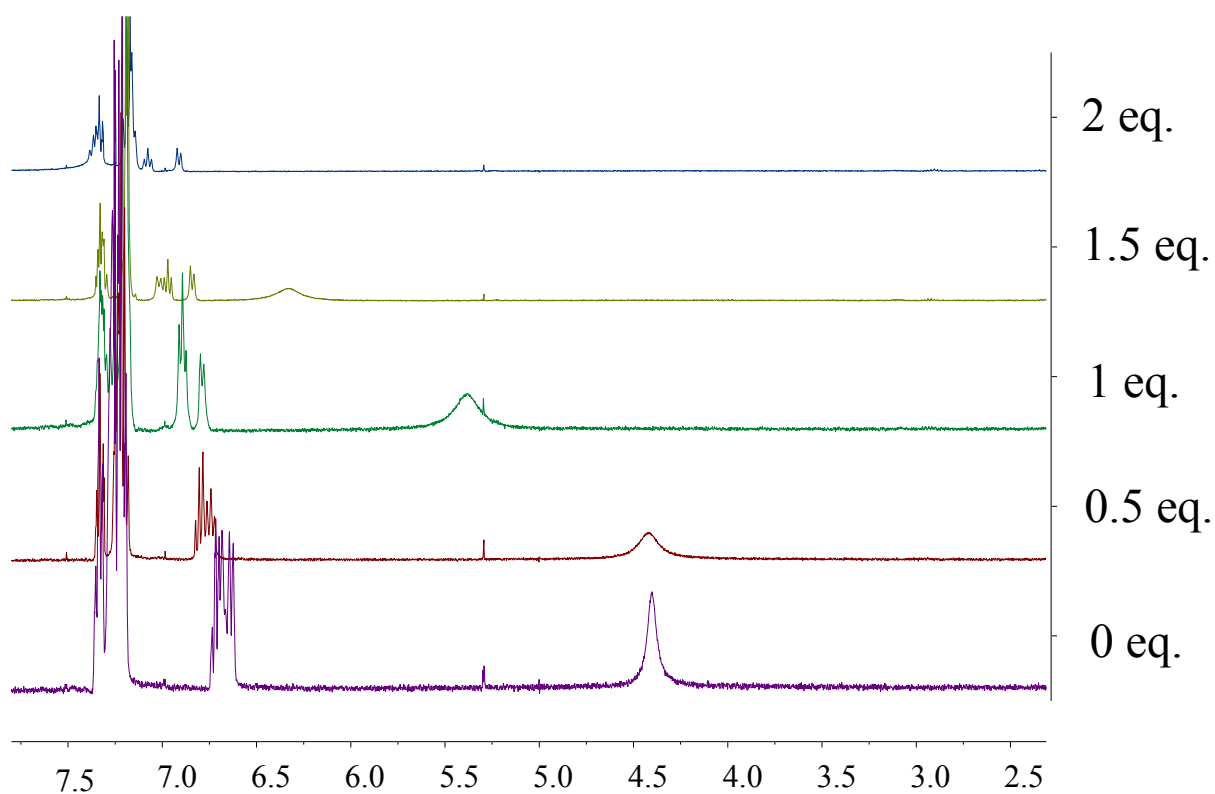

**Fig.S11** NMR titration spectra of complex **3** for the titration of TFA (0~2 eq. TFA) in CH<sub>2</sub>Cl<sub>2</sub> at room temperature, each spectra was obtained after equilibration for 10 min.

(a)

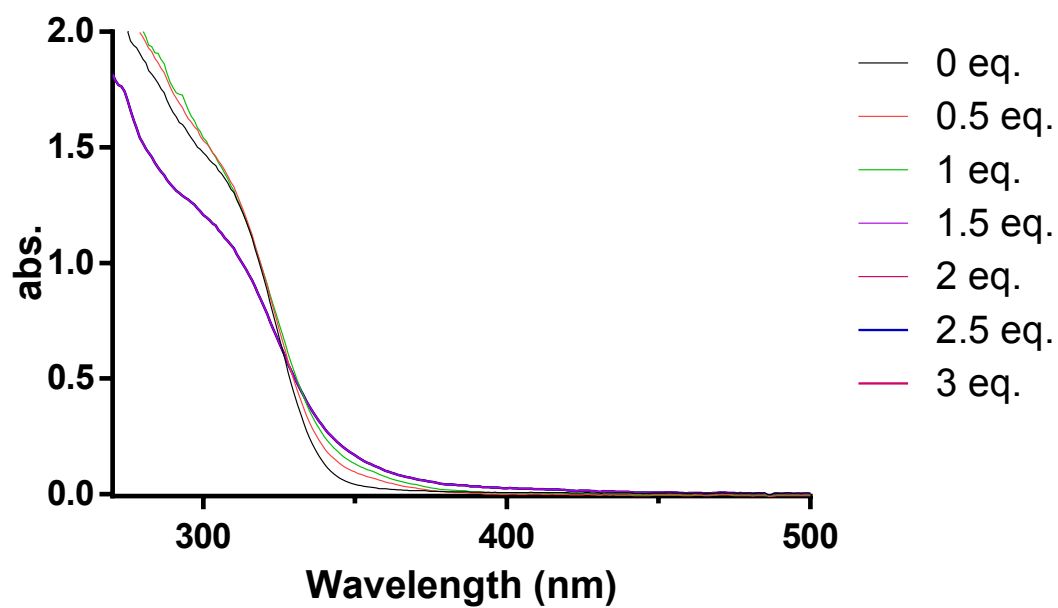

(b)

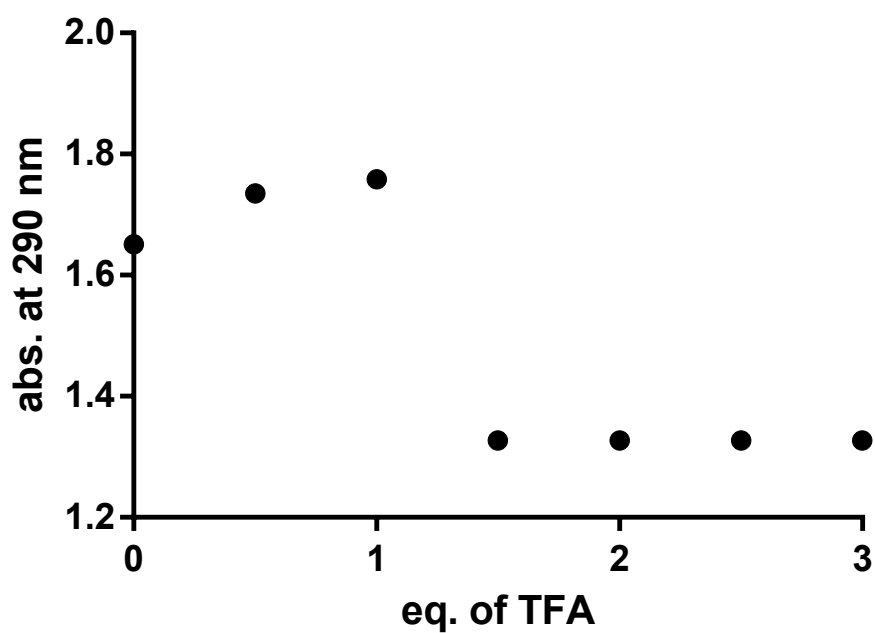

**Fig. S12** (a) Absorption spectral change of complex **4** for the titration of TFA (0~3 eq. TFA) in  $\text{CH}_2\text{Cl}_2$  at room temperature, Each spectrum was obtained after equilibration for 10 min. (b) Absorbance change at 300 nm over TFA concentration.

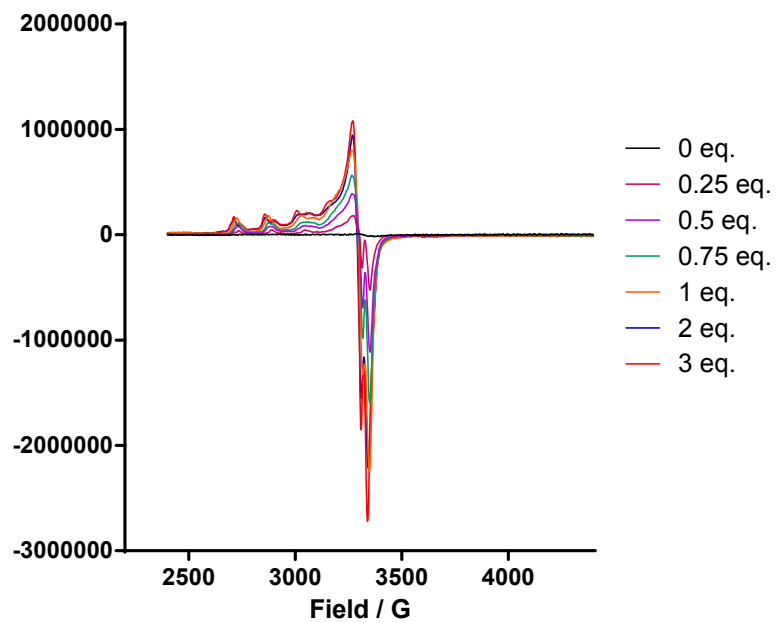

**Fig. S13** EPR spectra of complex **4** for the titration of TFA (0~1 eq. TFA) in CH<sub>2</sub>Cl<sub>2</sub> at room temperature, each spectra was obtained after equilibration for 10 mins.

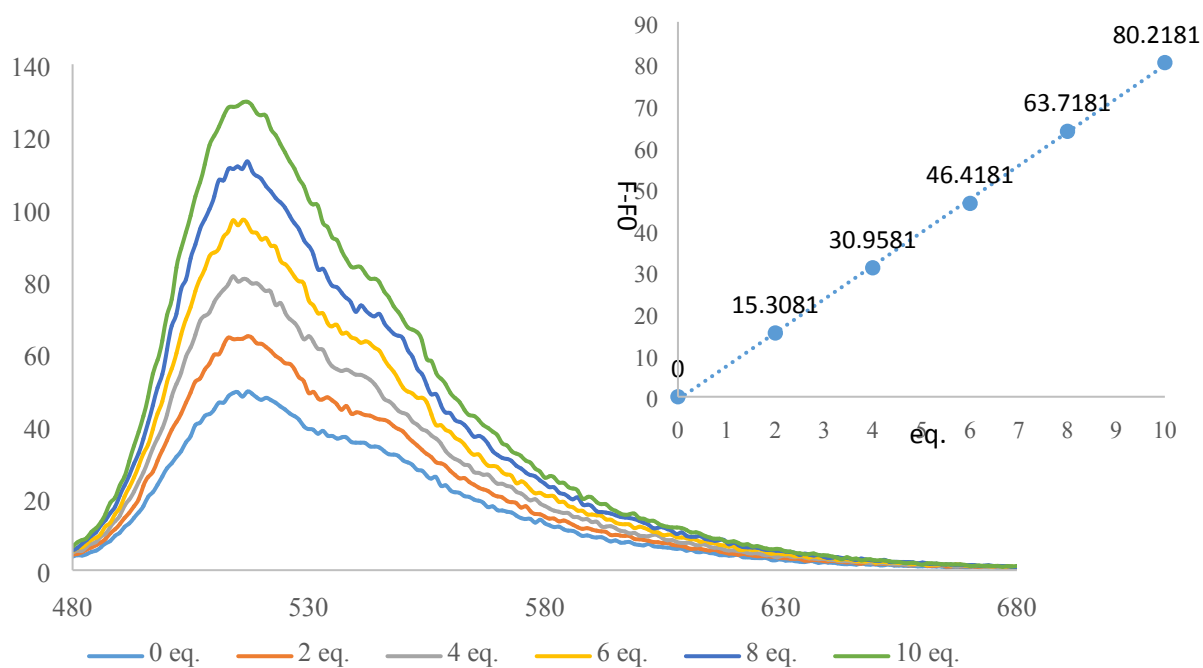

**Fig. S14** Fluorescence emission spectra of FA-OMe (1  $\mu$ M) upon reaction with various amounts of DETA NONOate in 100 mM PBS buffer with 0.54% DMSO of pH 8.5 at  $25.0 \pm 0.1$   $^{\circ}$ C ( $\lambda_{ex}$  460 nm,  $\lambda_{em}$  515 nm). Inset shows an enhancement in fluorescence intensity presents a linear correlation with concentration of DETA NONOate.

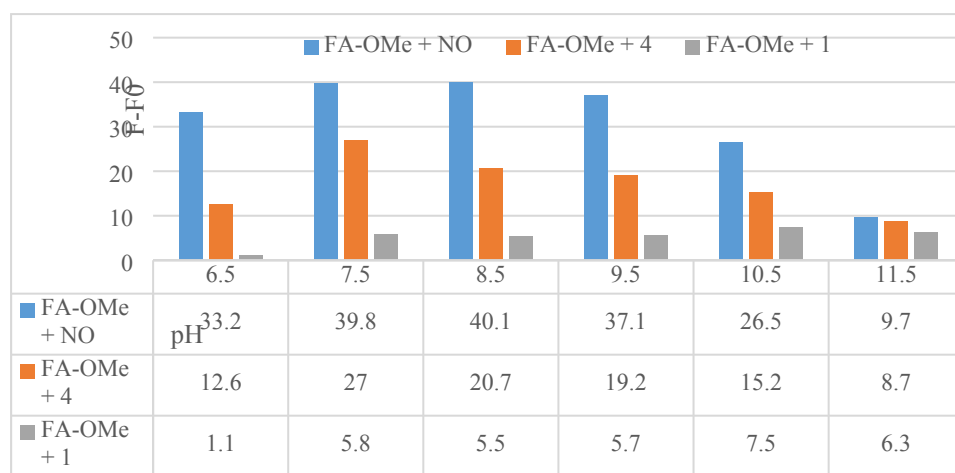

**Fig. S15** Normalized fluorescence response of the FA-OMe (1  $\mu\text{M}$ ) with DETA NONOate, **1**, and **4** (5  $\mu\text{M}$ ) in different pH values (100 mM PBS buffer with 0.54% DMSO) and  $25.0 \pm 0.1$   $^{\circ}\text{C}$ . Tabulated values indicates the NO release response shown by DETA NONOate compared with the complex **4** and complex **1**.

**Tab. S1** First order rate constants for the reaction of **1** and **4** with excess TFA in  $\text{CH}_2\text{Cl}_2$  at 273 K.

| [TFA] / mM | $k_{\text{obs}}/\text{s}^{-1}$ (complex <b>1</b> ) | $k_{\text{obs}}/\text{s}^{-1}$ (complex <b>4</b> ) |
|------------|----------------------------------------------------|----------------------------------------------------|
| 9.41       | $(1.4 \pm 0.04) \times 10^{-2}$                    | $(6.9 \pm 0.62) \times 10^{-3}$                    |
| 18.82      | $(2.1 \pm 0.02) \times 10^{-2}$                    | $(1.2 \pm 0.04) \times 10^{-2}$                    |
| 28.23      | $(2.9 \pm 0.02) \times 10^{-2}$                    | $(1.9 \pm 0.05) \times 10^{-2}$                    |
| 37.64      | $(4.0 \pm 0.05) \times 10^{-2}$                    | $(2.2 \pm 0.22) \times 10^{-2}$                    |
| 47.05      | $(4.9 \pm 0.01) \times 10^{-2}$                    | $(3.0 \pm 0.44) \times 10^{-2}$                    |

<sup>a</sup> Average values of three experimental values.

**Tab. S2** Selected Bond Lengths (Å) and Angles (°) for **2**, **3**, and **4**.

|                 | <b>2</b>  | <b>3</b>  | <b>4</b>  |
|-----------------|-----------|-----------|-----------|
| Cu(1)-P(1)      | 2.230(1)  | 2.2781(7) | 2.233(1)  |
| Cu(1)-P(2)      | 2.225(1)  | 2.2410(6) | 2.243(1)  |
| Cu(1)-N(1)      | 2.212(3)  | 2.251(2)  | -         |
| Cu(1)-N(2)      | 2.071(3)  | -         | -         |
| Cu(1)-O(2)      | -         | -         | 2.257(3)  |
| Cu(1)-O(1)      | -         | -         | 2.226(3)  |
| Cu(1)-halide    | -         | 2.3073(8) | -         |
| P(1)-Cu(1)-P(2) | 131.66(4) | 126.05(3) | 129.58(4) |
